# Supplementary material
Source: publisher figshare collection journal article supplement (https://tandf.figshare.com/articles/dataset/_/1128657)

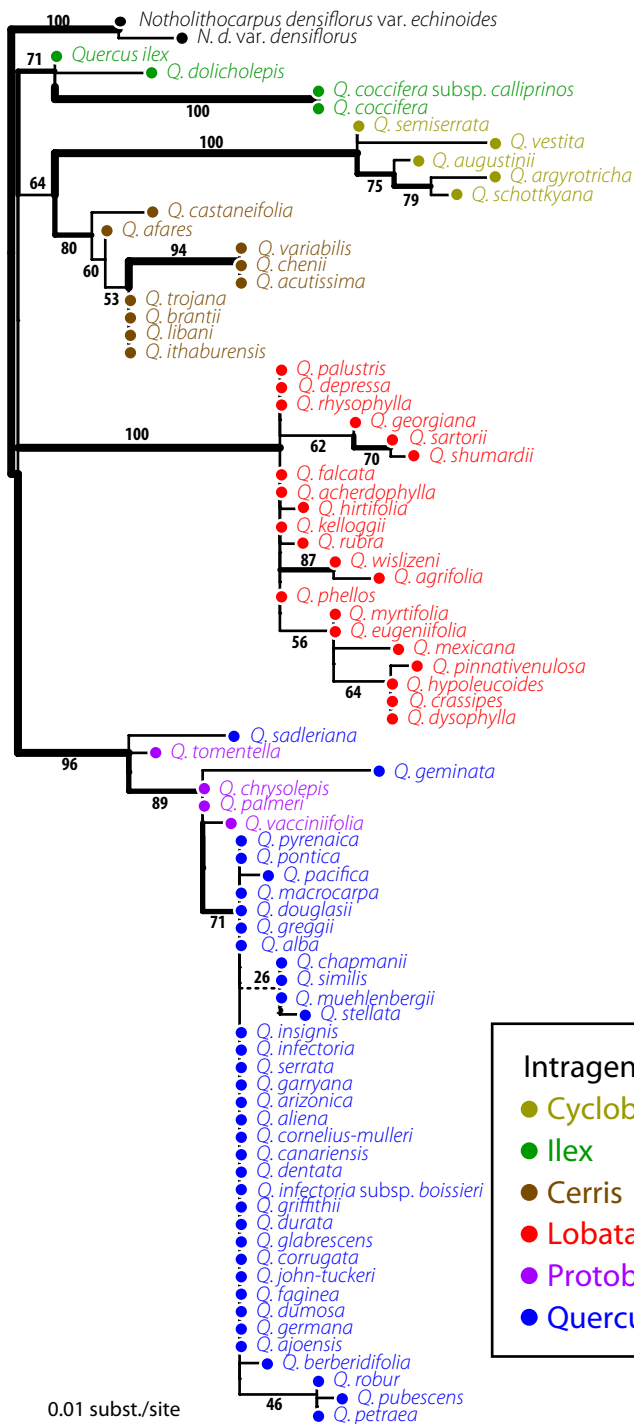

Gene CL1155

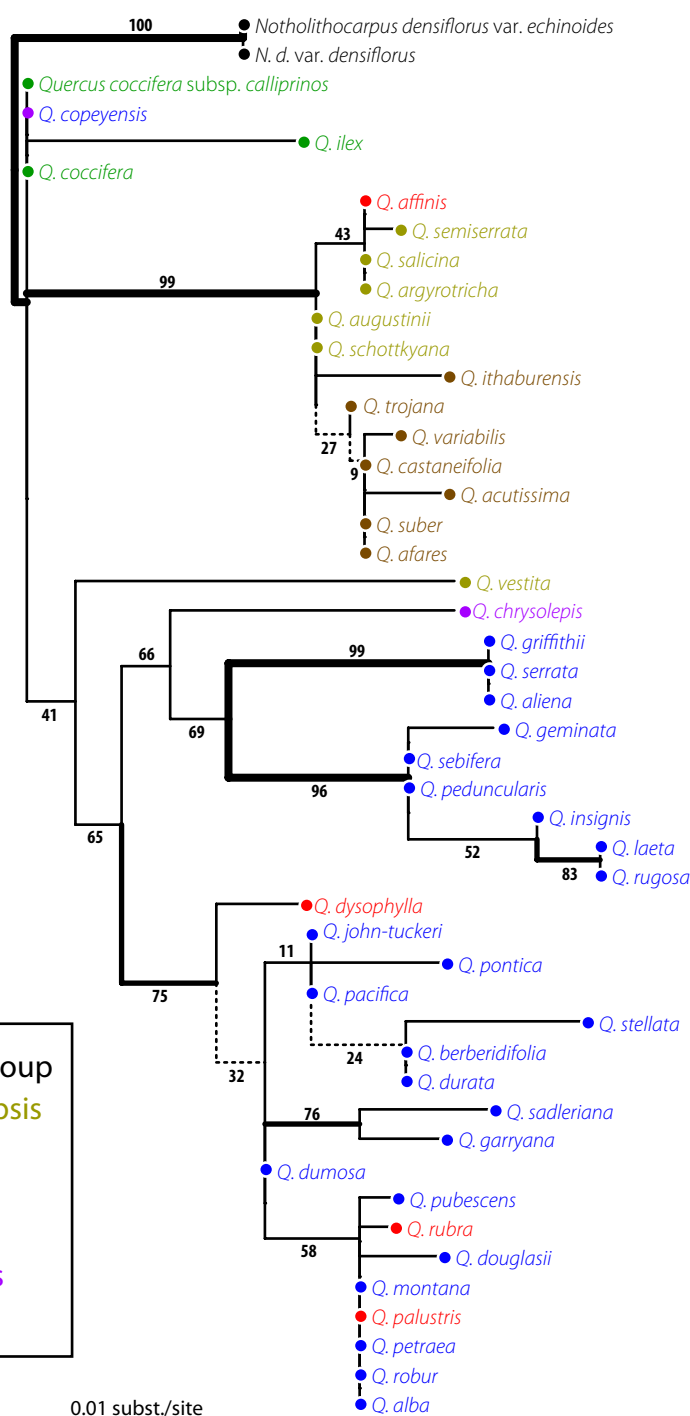

Gene CL5191

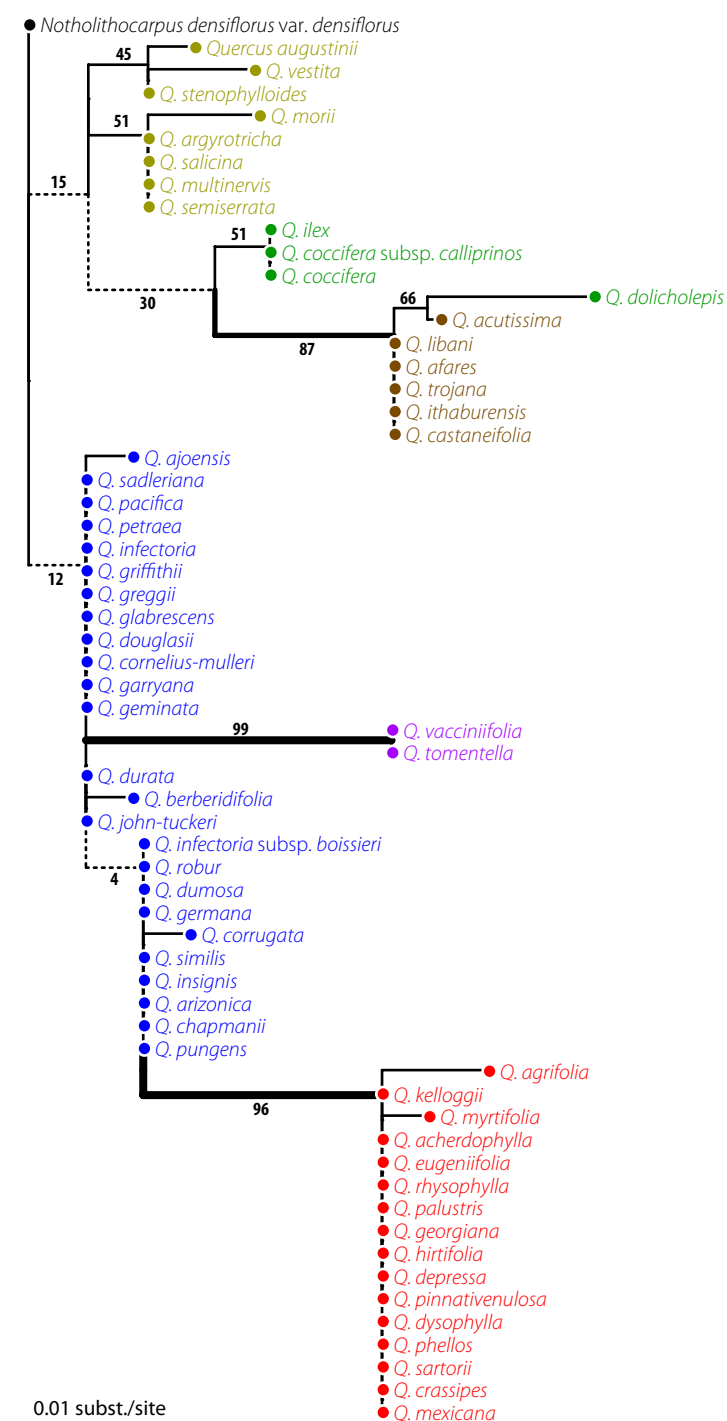

Gene CL8461

Supplemental Figure 3

Supplement: Supplementary file 1 [file 4]

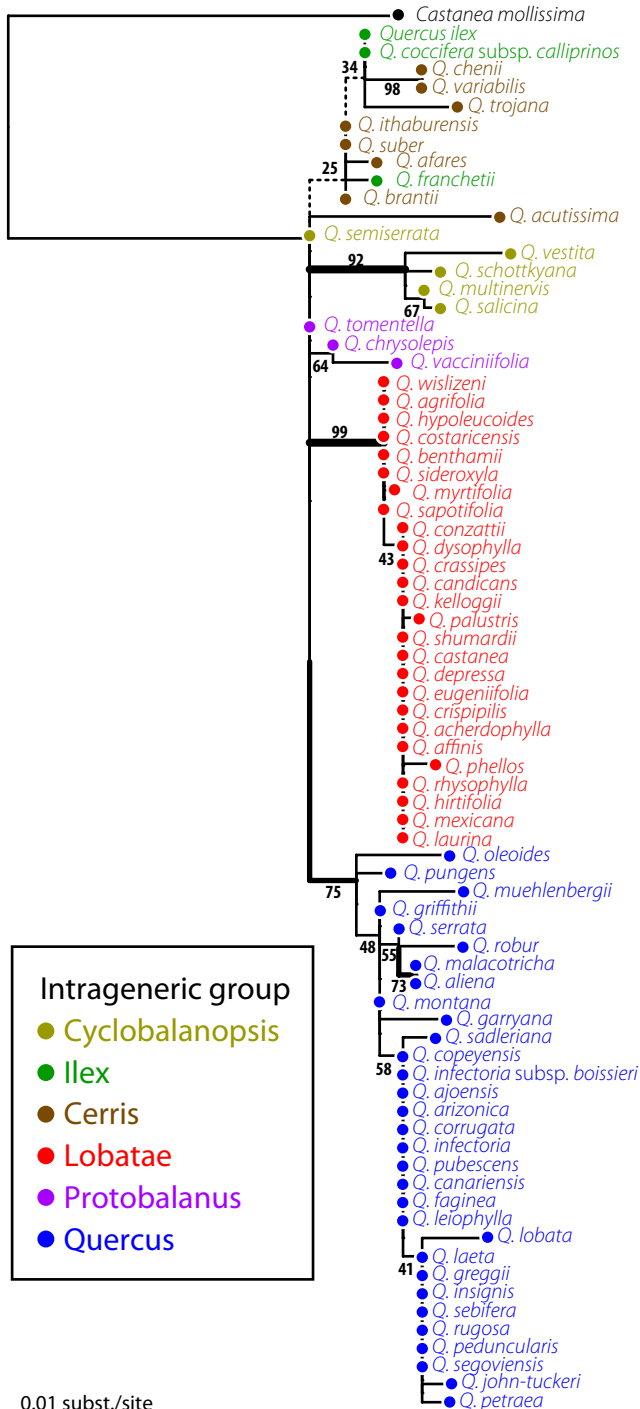

Gene CL8561

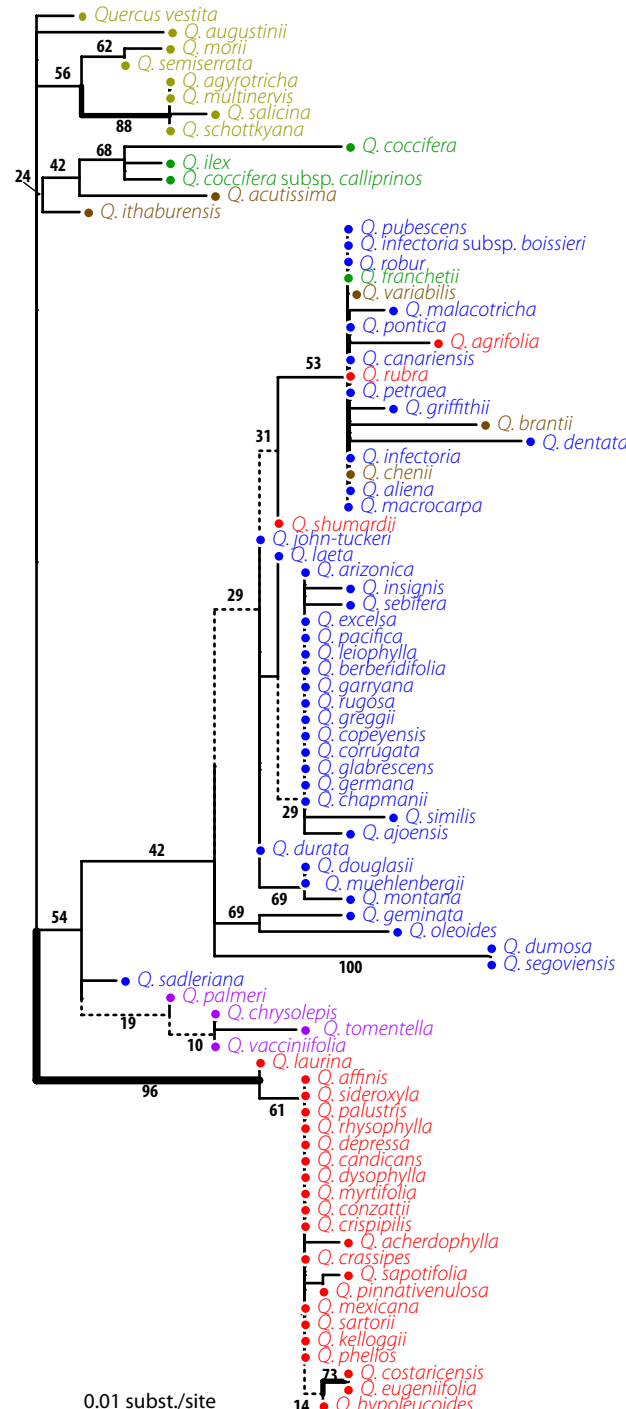

Gene CL8745

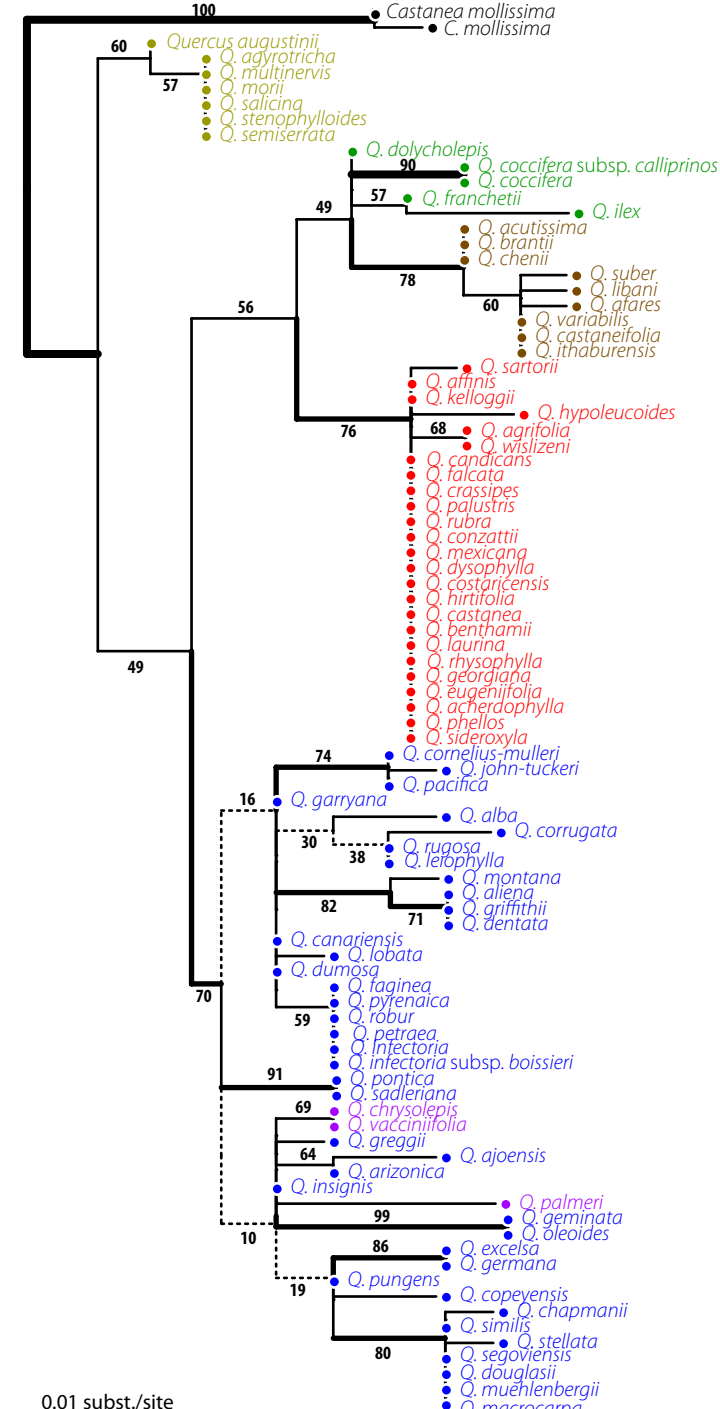

Gene CL9715

Supplemental Figure 2

Supplement: Supplementary file 2 [file 4]

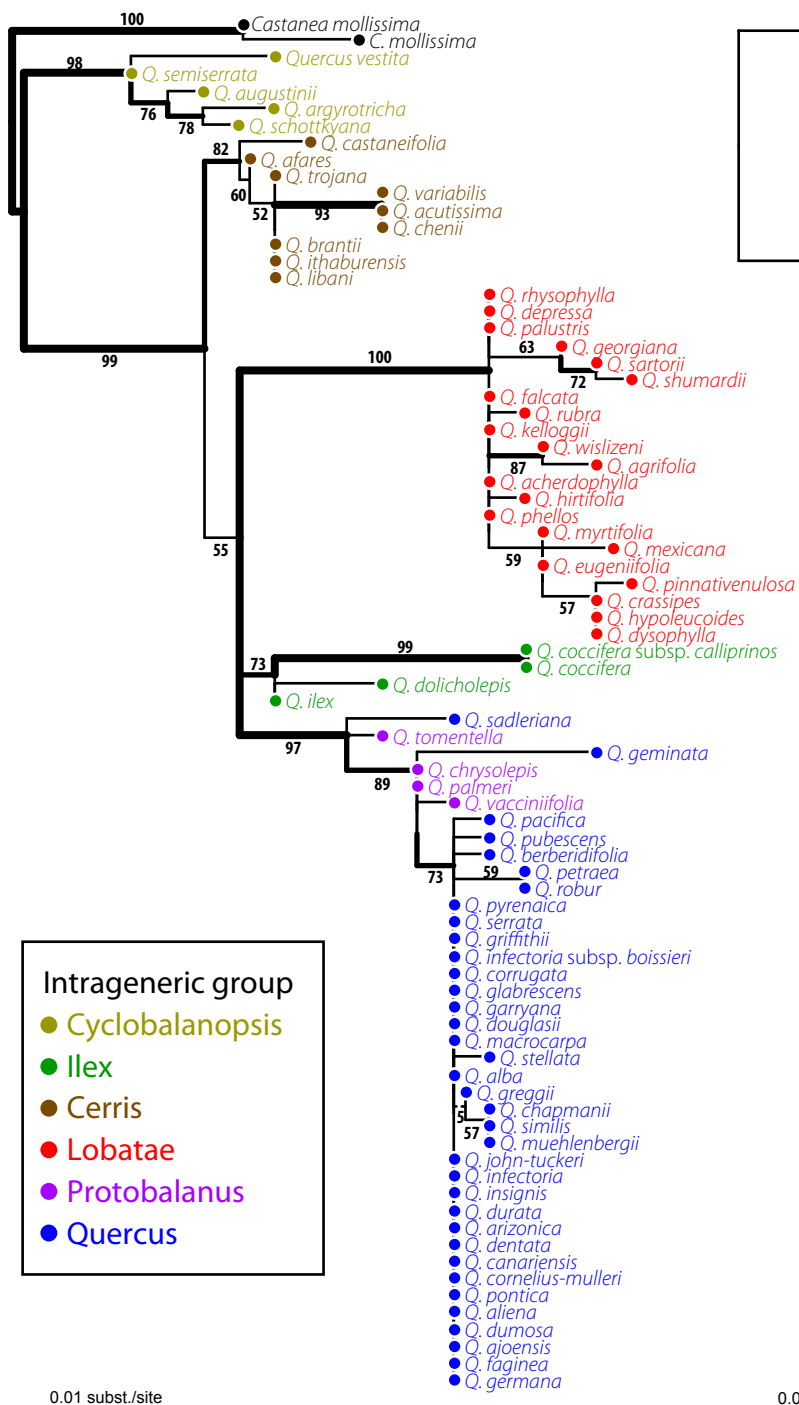

Gene CL1155

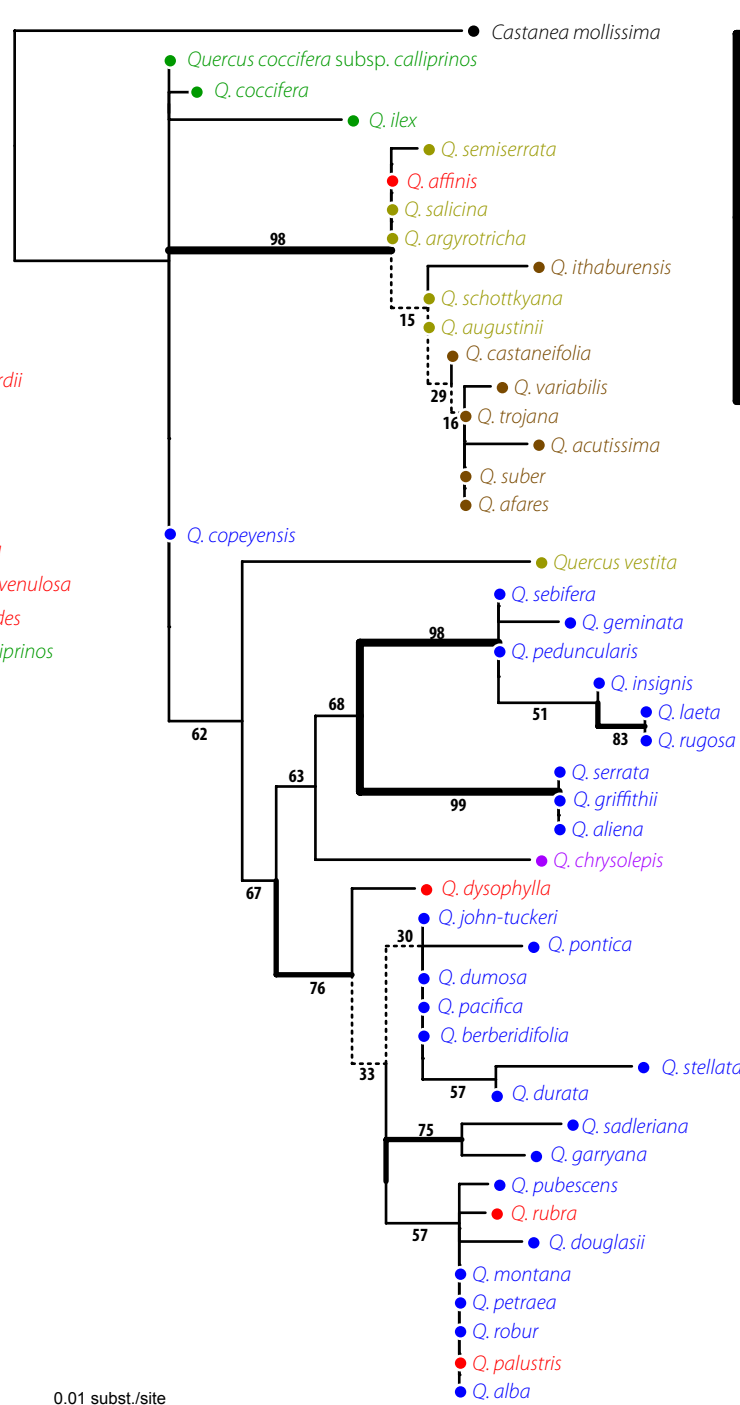

Gene CL5191

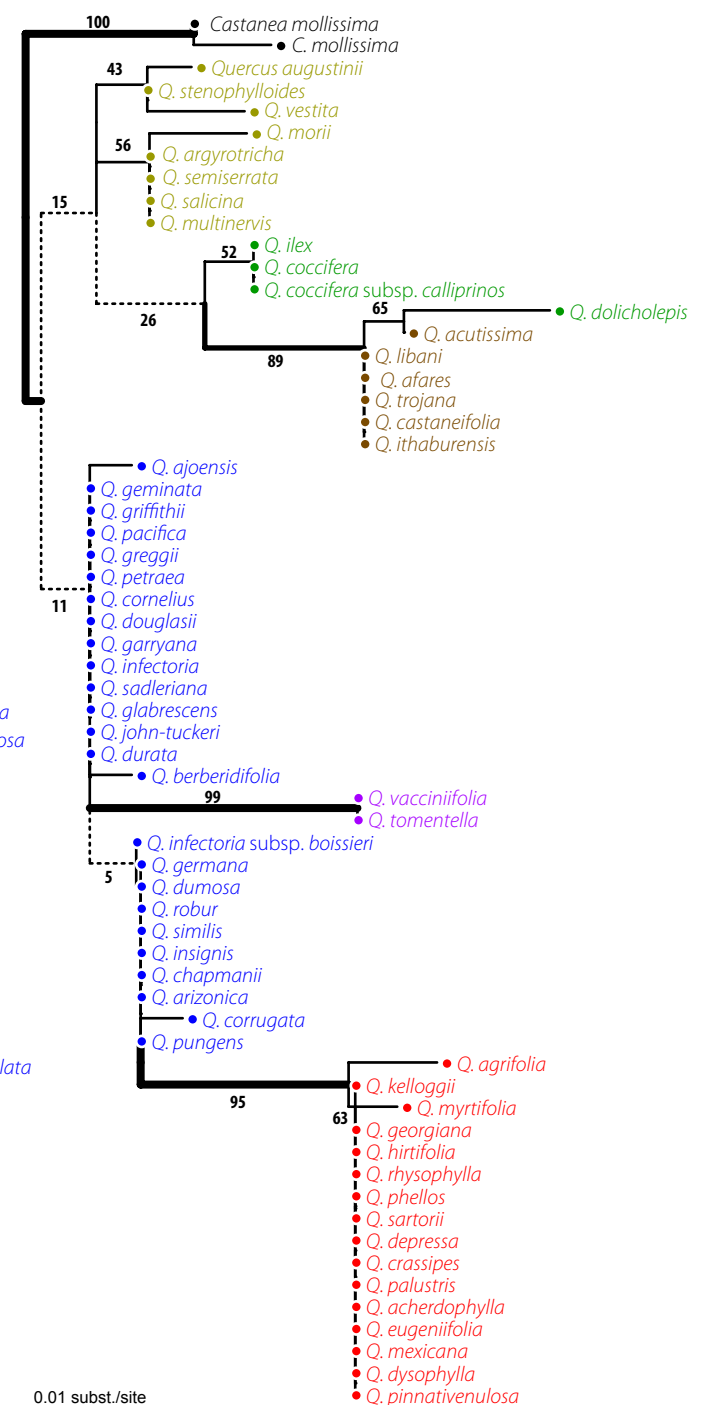

Gene CL8461

Supplemental Figure 1

Supplement: Supplementary file 3 [file 4]

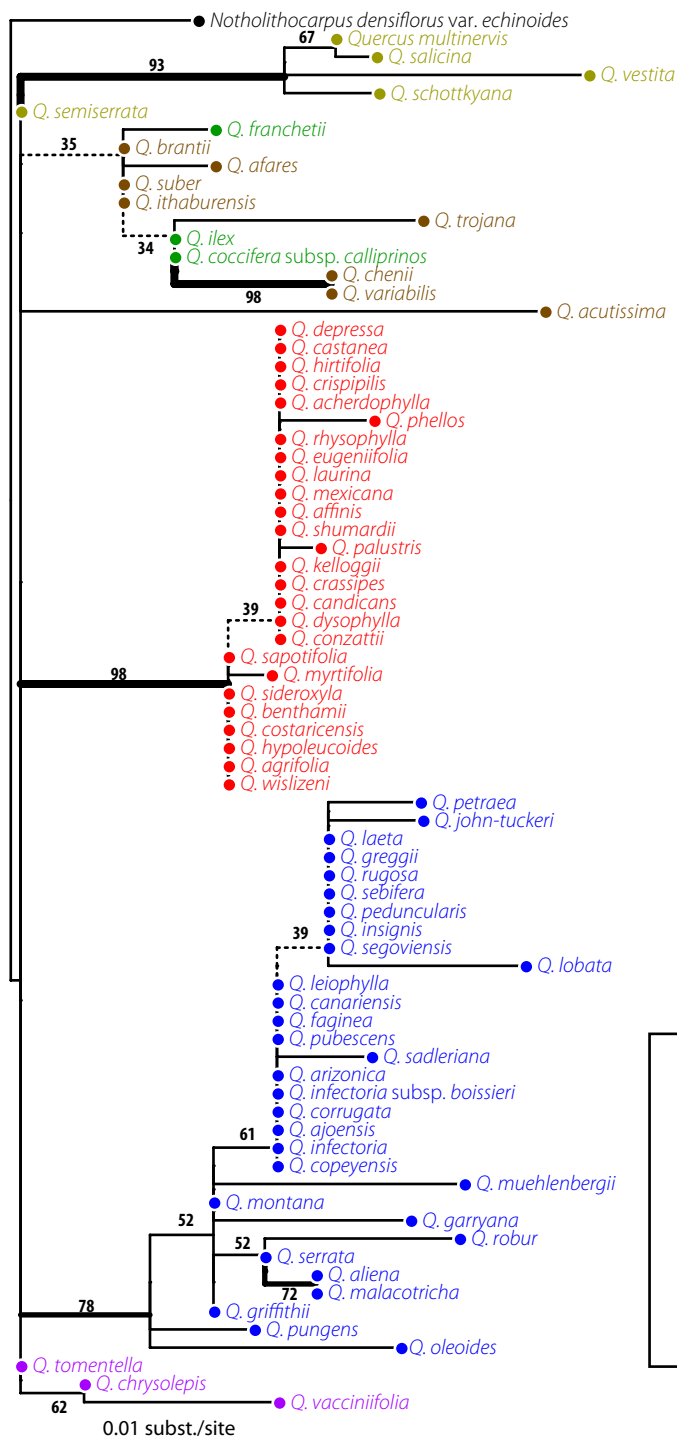

Gene CL8561

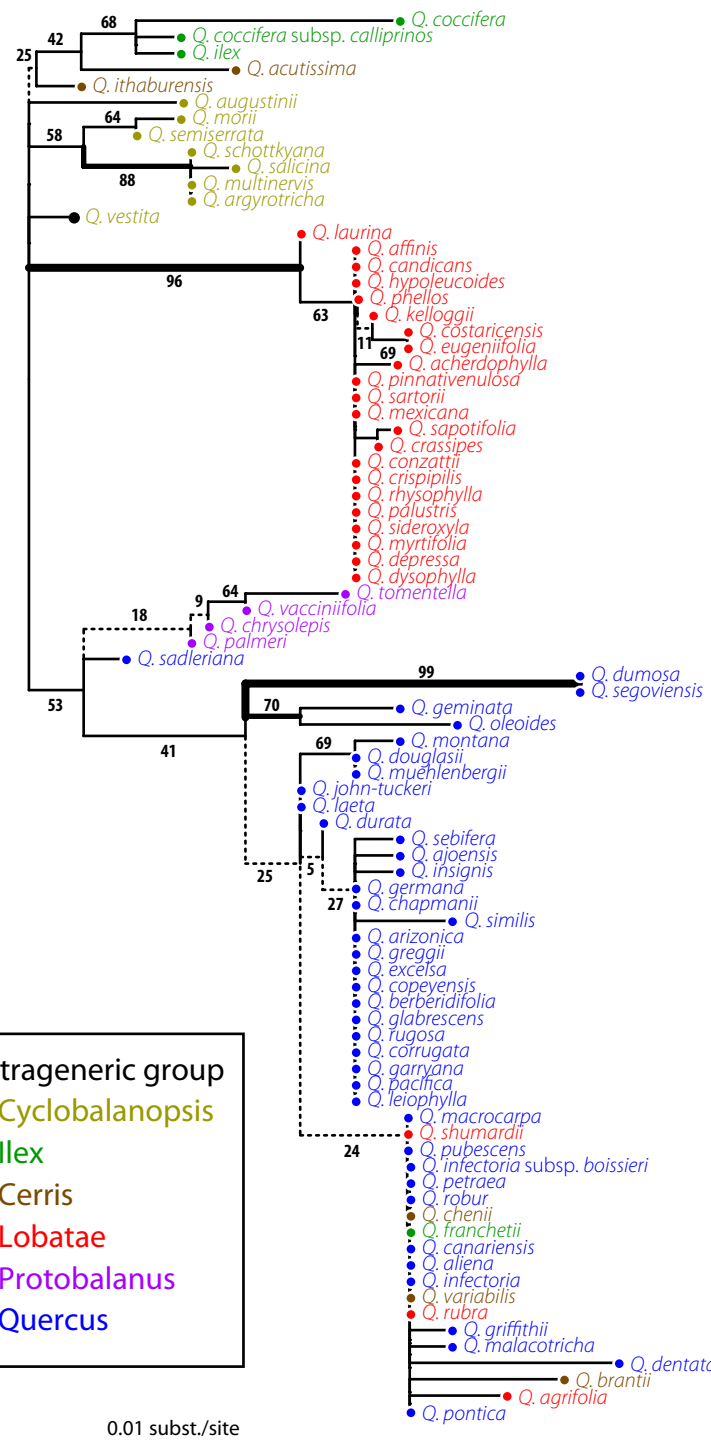

Gene CL8745

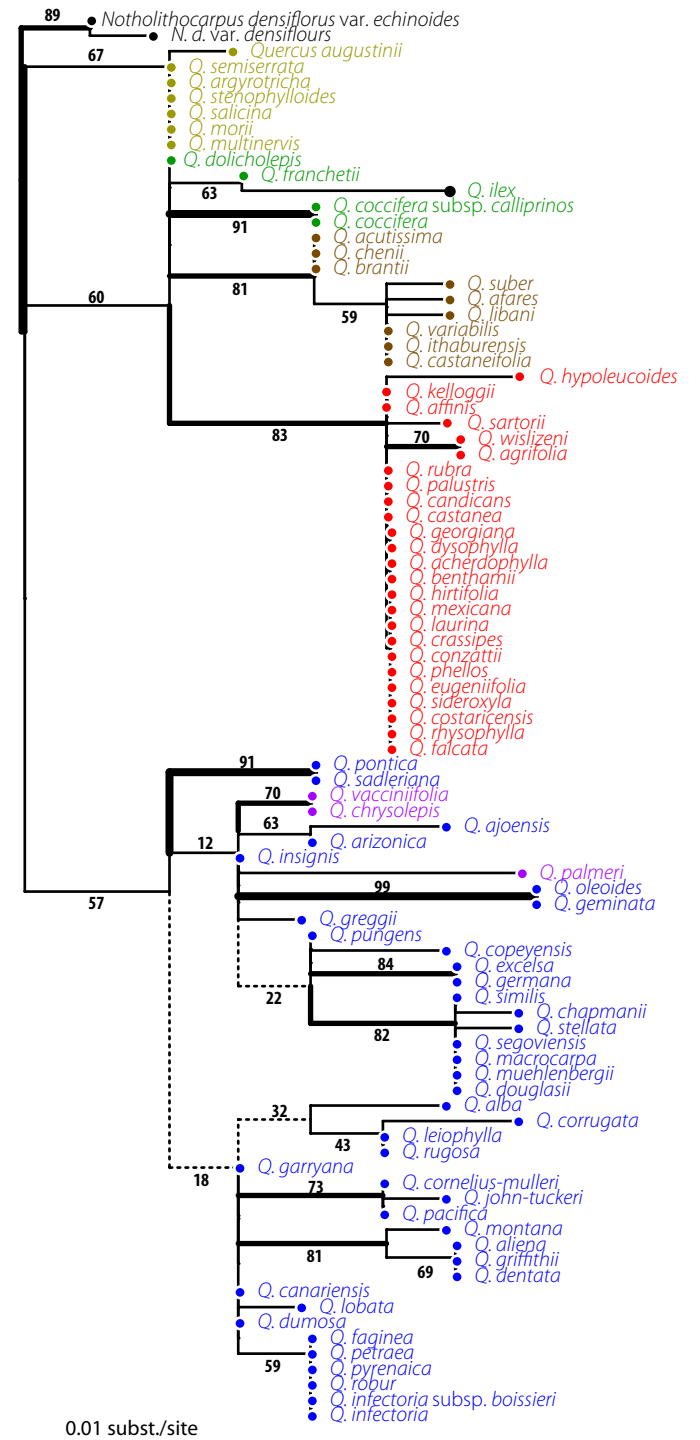

Gene CL9715

Supplemental Figure 4

Supplement: Supplementary file 4 [file 4]
